# Supplementary material for: Local and global genetic diversity of protozoan parasites: Spatial distribution of Cryptosporidium and Giardia genotypes
Source: PLoS Negl Trop Dis. 2017 Jul 13;11(7):e0005736. doi: 10.1371/journal.pntd.0005736 (PMC5526614; doi:10.1371/journal.pntd.0005736)
Supplement: S2 Table — (DOCX) [file pntd.0005736.s007.docx]

S2 Table. Species, sample ID, haplotype number, host, genotypes, number of sequences per haplotype and GenBank accession numbers of data included in this study.

| **Species** | **Sample ID** | **Haplotype** | **Host** | **Genotype** | **N** | **GenBank accession number** |
| --- | --- | --- | --- | --- | --- | --- |
| *Cryptosporidium cuniculus* | 6584 | 1 | Human | Vb | 2 | KY123918 |
| 3132 | 2 | Human | 1 | KY123919 |
| 10171 | 3 | Human | 1 | KY123920 |
| *C. erinacei* | 1823 | 1 | Human | XIII | 1 | KY123921 |
| 10380 | 2 | Human | 1 | KY123922 |
| *C. hominis* | 10041 | 1 | Human | Ia | 2 | KY123923 |
| 10296 | 2 | Human | 2 | KY123924 |
| 5527 | 3 | Human | Id | 6 | KY123925 |
| 5191 | 4 | Human | 2 | KY123926 |
| 6582 | 5 | Human | 1 | KY123927 |
| 10521 | 6 | Human | Ie | 6 | KY123928 |
| 10324 | 7 | Human | 4 | KY123929 |
| 5740 | 8 | Human | Ig | 67 | KY123930 |
| 6769 | 9 | Human | 1 | KY123931 |
| 4040 | 10 | Human | 2 | KY123932 |
| 6761 | 11 | Human | 1 | KY123933 |
| 7018 | 12 | Human | 1 | KY123934 |
| 9176 | 13 | Human | 9 | KY123935 |
| 10073 | 14 | Human | Ib | 2 | KY123936 |
| 5154 | 15 | Human | 1 | KY123937 |
| 3527 | 16 | Human | 1 | KY123938 |
| 4813 | 17 | Human | 1 | KY123939 |
| 5813 | 18 | Human | 126 | KY123940 |
| 9400 | 19 | Human | 1 | KY123941 |
| 9111 | 20 | Human | If | 1 | KY123942 |
| 7181 | 21 | Human | 1 | KY123943 |
| 6528 | 22 | Human | 1 | KY123944 |
| 6886 | 23 | Human | 1 | KY123945 |
| 5059 | 24 | Human | 1 | KY123946 |
| *C. parvum* | 4642 | 1 | Human | IIa | 138 | KY123947 |
| 6694 | 2 | Human | 1 | KY123948 |
| 2904 | 3 | Human | 1 | KY123949 |
| 2769 | 4 | Human | 1 | KY123950 |
| 9917 | 5 | Human | 13 | KY123951 |
| 9907 | 6 | Human | 2 | KY123952 |
| 9354 | 7 | Human | 1 | KY123953 |
| 9902 | 8 | Human | 3 | KY123954 |
| 4987 | 9 | Human | 1 | KY123955 |
| 10374 | 10 | Human | 1 | KY123956 |
| 9576 | 11 | Human | 3 | KY123957 |
| 5581 | 12 | Human | 1 | KY123958 |
| 6690 | 13 | Human | 3 | KY123959 |
| 4588 | 14 | Human | 32 | KY123960 |
| 4088 | 15 | Human | 2 | KY123961 |
| 3044 | 16 | Human | 1 | KY123962 |
| 5386 | 17 | Human | 1 | KY123963 |
| 5978 | 18 | Human | 1 | KY123964 |
| 9994 | 19 | Human | 10 | KY123965 |
| 4732 | 20 | Human | 1 | KY123966 |
| 9985 | 21 | Human | IId | 29 | KY123967 |
| 10178 | 22 | Human | 1 | KY123968 |
| 10042 | 23 | Human | 11 | KY123969 |
| 4041 | 24 | Human | 1 | KY123970 |
| 7377 | 25 | Human | 1 | KY123971 |
| 8803 | 26 | Human | 2 | KY123972 |
| 5188 | 27 | Human | 1 | KY123973 |
| 9999 | 28 | Human | 1 | KY123974 |
| 4009 | 29 | Human | 1 | KY123975 |
| 5704 | 30 | Human | 2 | KY123976 |
| 806 | 31 | Human | 1 | KY123977 |
| 4408 | 32 | Human | 1 | KY123978 |
| 6723 | 33 | Human | 2 | KY123979 |
| 10216 | 34 | Human | 1 | KY123980 |
| 9127 | 35 | Human | 1 | KY123981 |
| 10049 | 36 | Human | 2 | KY123982 |
| 10173 | 37 | Human | 1 | KY123983 |
| 9115 | 38 | Human | 6 | KY123984 |
| 3230 | 39 | Human | 1 | KY123985 |
| 5058 | 40 | Human | IIc | 3 | KY123986 |
| 5832 | 41 | Human | IIe | 1 | KY123987 |
| 4642_c | 1 | Cattle | IIa | 23 | KY123988 |
| 4588_c | 14 | Cattle | IIa | 18 | KY123989 |
| 9985_c | 21 | Cattle | IId | 1 | KY123990 |
| 9115_c | 38 | Cattle | IId | 1 | KY123991 |
| 4642_s | 1 | Sheep | IIa | 1 | KY123992 |
| 4588_s | 14 | Sheep | IIa | 1 | KY123993 |
|  |  |  |  |  |  |  |
| *Giardia intestinalis* | 10112_A | 1 | Human | A | 1 | KY123994 |
| 9856 | 2 | Human | 2 | KY123995 |
| 9856_cat | 2 | Cat | 1 | KY123996 |
| 10129 | 3 | Human | 6 | KY123997 |
| 10129_cattle | 3 | Cattle | 1 | KY123998 |
| 10146 | 4 | Human | 6 | KY123999 |
| 10146_duck | 4 | Duck | 2 | KY124000 |
| 10210 | 5 | Human | 235 | KY124001 |
| 10210_cat | 5 | Cat | 1 | KY124002 |
| 10210_dog | 5 | Dog | 1 | KY124003 |
| 10210_gibbon | 5 | Gibbon | 1 | KY124004 |
| 6540 | 6 | Human | 1 | KY124005 |
| 3184 | 7 | Human | 3 | KY124006 |
| 9085 | 8 | Human | 1 | KY124007 |
| 7197 | 9 | Human | 1 | KY124008 |
| 9544 | 10 | Human | 1 | KY124009 |
| 10402 | 11 | Human | 1 | KY124010 |
| 9481_B | 12 | Human | B | 63 | KY124011 |
| 5924 | 13 | Human | 750 | KY124012 |
| 5924_cattle | 13 | Cattle | 2 | KY124013 |
| 5924_dog | 13 | Dog | 2 | KY124014 |
| 5924_lemur | 13 | Lemur | 1 | KY124015 |
| 5924_meerkat | 13 | Meerkat | 1 | KY124016 |
| 5924_possum | 13 | Possum | 1 | KY124017 |
| 5924_spider | 13 | Spider Monkey | 1 | KY124018 |
| 10707_porcupine | 14 | Porcupine | 4 | KY124019 |
| 10707 | 14 | Human | 1 | KY124020 |
| 6612_duck | 15 | Duck | 2 | KY124021 |
| 6609_duck | 16 | Duck | 2 | KY124022 |
| 5622_bonnet | 17 | Bonnet macaque | 1 | KY124023 |
| 6948 | 18 | Human | 1 | KY124024 |
| 6948_duck | 18 | Duck | 1 | KY124025 |
| 6973 | 19 | Human | 1 | KY124026 |
| 6973_cattle | 19 | Cattle | 1 | KY124027 |
| 8963 | 20 | Human | 1 | KY124028 |
| 8963_cattle | 20 | Cattle | 1 | KY124029 |
| 8963_duck | 20 | Duck | 1 | KY124030 |
| 9088 | 21 | Human | 1 | KY124031 |
| 9088_duck | 21 | Duck | 1 | KY124032 |
| 9309 | 22 | Human | 1 | KY124033 |
| 9309_cattle | 22 | Cattle | 1 | KY124034 |
| 9336 | 23 | Human | 1 | KY124035 |
| 9336_cattle | 23 | Cattle | 1 | KY124036 |
| 9336_duck | 23 | Duck | 1 | KY124037 |
| 9102 | 24 | Human | 1 | KY124038 |
| 5629 | 25 | Human | 8 | KY124039 |
| 6488 | 26 | Human | 7 | KY124040 |
| 5064 | 27 | Human | 6 | KY124041 |
| 4739 | 28 | Human | 5 | KY124042 |
| 9659 | 29 | Human | 5 | KY124043 |
| 9292 | 30 | Human | 4 | KY124044 |
| 6350 | 31 | Human | 4 | KY124045 |
| 5633 | 32 | Human | 5 | KY124046 |
| 9579 | 33 | Human | 5 | KY124047 |
| 8888 | 34 | Human | 5 | KY124048 |
| 9073 | 35 | Human | 3 | KY124049 |
| 9699 | 36 | Human | 3 | KY124050 |
| 5646 | 37 | Human | 11 | KY124051 |
| 10107 | 38 | Human | 4 | KY124052 |
| 8970 | 39 | Human | 6 | KY124053 |
| 9264 | 40 | Human | 6 | KY124054 |
| 8818 | 41 | Human | 4 | KY124055 |
| 8752 | 42 | Human | 4 | KY124056 |
| 9573 | 43 | Human | 4 | KY124057 |
| 6681 | 44 | Human | 31 | KY124058 |
| 9826 | 45 | Human | 14 | KY124059 |
| 3592 | 46 | Human | 7 | KY124060 |
| 3923 | 47 | Human | 7 | KY124061 |
| 3922 | 48 | Human | 4 | KY124062 |
| 3951 | 49 | Human | 3 | KY124063 |
| 10441 | 50 | Human | 5 | KY124064 |
| 9936 | 51 | Human | 5 | KY124065 |
| 3617 | 52 | Human | 5 | KY124066 |
| 5053 | 53 | Human | 5 | KY124067 |
| 9642 | 54 | Human | 6 | KY124068 |
| 9674 | 55 | Human | 6 | KY124069 |
| 6173 | 56 | Human | 6 | KY124070 |
| 10325 | 57 | Human | 5 | KY124071 |
| 10032 | 58 | Human | 5 | KY124072 |
| 10011 | 59 | Human | 4 | KY124073 |
| 9297 | 60 | Human | 4 | KY124074 |
| 3108 | 61 | Human | 4 | KY124075 |
| 6442 | 62 | Human | 6 | KY124076 |
| 9961 | 63 | Human | 5 | KY124077 |
| 9484 | 64 | Human | 5 | KY124078 |
| 9831 | 65 | Human | 6 | KY124079 |
| 7114 | 66 | Human | 6 | KY124080 |
| 9703 | 67 | Human | 6 | KY124081 |
| 10057 | 68 | Human | 5 | KY124082 |
| 7324 | 69 | Human | 5 | KY124083 |
| 3128 | 70 | Human | 5 | KY124084 |
| 7284 | 71 | Human | 3 | KY124085 |
| 9662 | 72 | Human | 2 | KY124086 |
| 9648 | 73 | Human | 2 | KY124087 |
| 9660 | 74 | Human | 8 | KY124088 |
| 6872 | 75 | Human | 5 | KY124089 |
| 8967 | 76 | Human | 5 | KY124090 |
| 7334 | 77 | Human | 5 | KY124091 |
| 5672 | 78 | Human | 5 | KY124092 |
| 9077 | 79 | Human | 6 | KY124093 |
| 9144 | 80 | Human | 6 | KY124094 |
| 10304 | 81 | Human | 6 | KY124095 |
| 3540 | 82 | Human | 6 | KY124096 |
| 9533 | 83 | Human | 6 | KY124097 |
| 9613 | 84 | Human | 5 | KY124098 |
| 9825 | 85 | Human | 5 | KY124099 |
| 9549 | 86 | Human | 5 | KY124100 |
| 9603 | 87 | Human | 4 | KY124101 |
| 6881_C_dog | 88 | Dog | C | 3 | KY124102 |
| 5534_D_dog | 89 | Dog | D | 4 | KY124103 |
| 1013_E_cattle | 90 | Cattle | E | 3 | KY124104 |
| 1013_E_sheep | 90 | Sheep | 9 | KY124105 |
| 4706_cattle | 91 | Cattle | 2 | KY124106 |
| 4706_sheep | 91 | Sheep | 6 | KY124107 |
| 4009_cattle | 92 | Cattle | 2 | KY124108 |
| 4009_sheep | 92 | Sheep | 5 | KY124109 |
| 1008_cattle | 93 | Cattle | 2 | KY124110 |
| 1008_sheep | 93 | Sheep | 4 | KY124111 |
| 954_cattle | 94 | Cattle | 1 | KY124112 |
| 4076_cattle | 95 | Cattle | 1 | KY124113 |
| 4083_cattle | 96 | Cattle | 1 | KY124114 |
| 4087_cattle | 97 | Cattle | 1 | KY124115 |
| 4844_cattle | 98 | Cattle | 1 | KY124116 |
| 6565_cattle | 99 | Cattle | 1 | KY124117 |
| 1006_cattle | 100 | Cattle | 1 | KY124118 |
| 4390_sheep | 101 | Sheep | 3 | KY124119 |
| 4265_sheep | 102 | Sheep | 2 | KY124120 |
| 3665_F_cat | 103 | Cat | F | 2 | KY124121 |
